# Supplementary material for: Reference gene selection for qRT-PCR analysis of season- and tissue-specific gene expression profiles in the honey bee Apis mellifera
Source: PubMed Central journal article supplement (PMC7435199; doi:10.1038/s41598-020-70965-4), 2020-08-18
Supplement: 41598_2020_70965_MOESM1_ESM.pdf [file 41598_2020_70965_MOESM1_ESM.pdf]

# Supplementary Information

---

## Reference gene selection for qRT-PCR analysis of season- and tissue-specific gene expression profiles in the honey bee *Apis mellifera*

Ji Hyang Jeon<sup>1</sup>, KyungHwan Moon<sup>2</sup>, YeongHo Kim<sup>2</sup>, and Young Ho Kim<sup>1,2,\*</sup>

<sup>1</sup>Department of Applied Biology, Kyungpook National University, Sangju, Gyeongbuk, Republic of Korea

<sup>2</sup>Department of Ecological Science, Kyungpook National University, Sangju, Gyeongbuk, Republic of Korea

\*Corresponding author, [yhkim05@knu.ac.kr](mailto:yhkim05@knu.ac.kr) (YHK)

**(A) Amplicons in agarose gel**

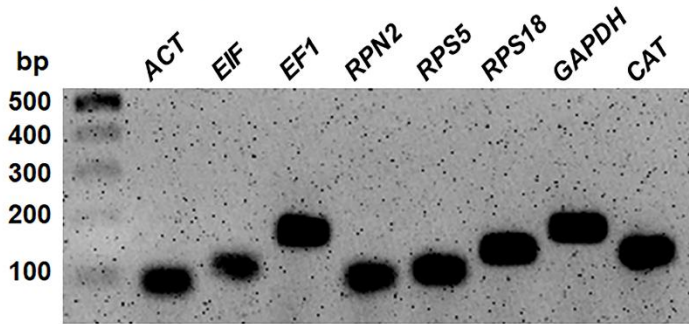

**(B) Melting curve analysis**

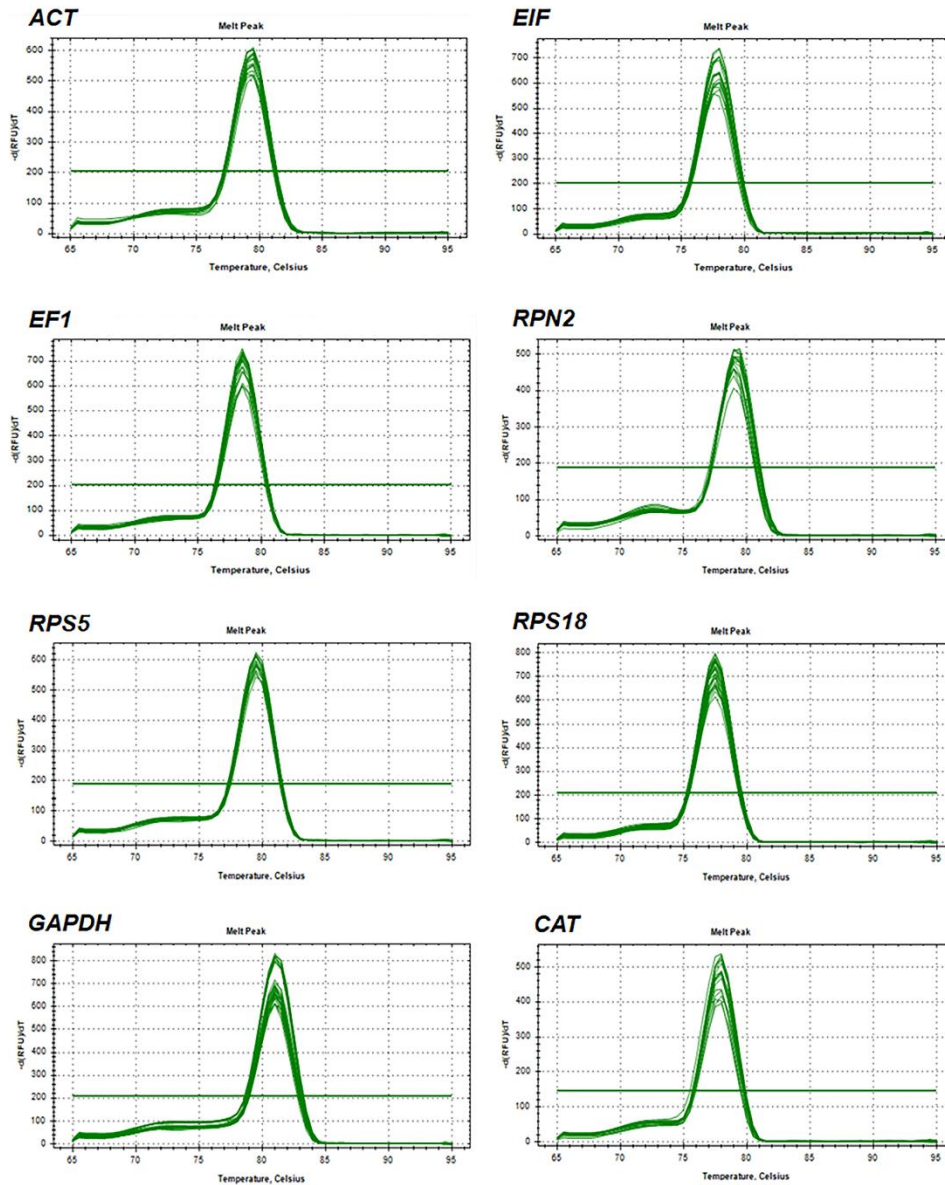

**Supplementary figure 1.** Specificity of qRT-PCR amplification. PCR products amplified with primers of seven candidate reference genes and a target gene (*CAT*) were visualized in 1% agarose gel (A). Melting curves for reference genes and *CAT* were analyzed by real-time PCR detection system (B).
